# Supplementary material
Source: Springer Nature journal article supplement (https://www.springermedizin.de/resource/supplementary/12890_2008_176_MOESM1_ESM.pdf/9504752)

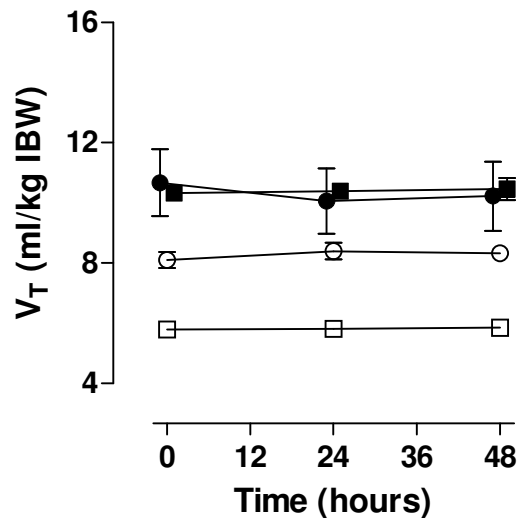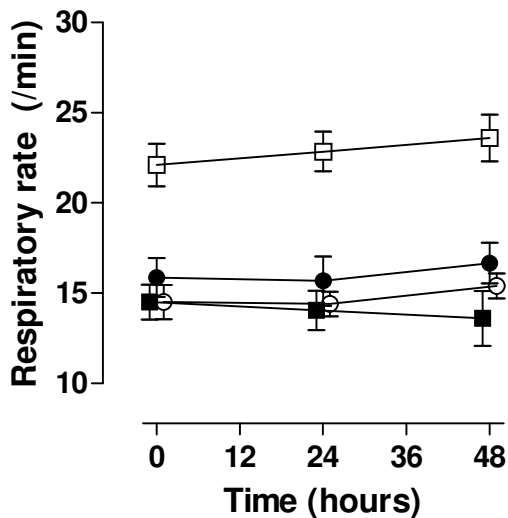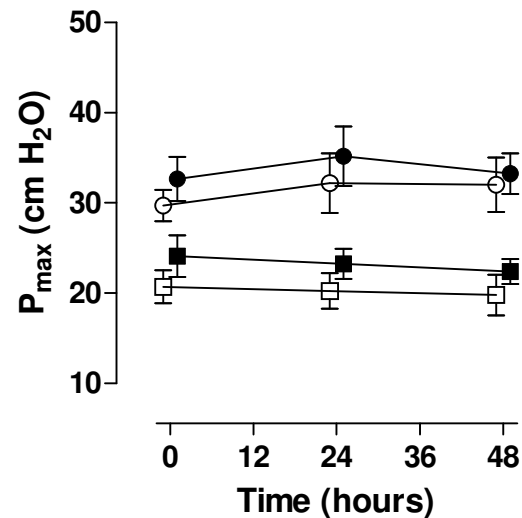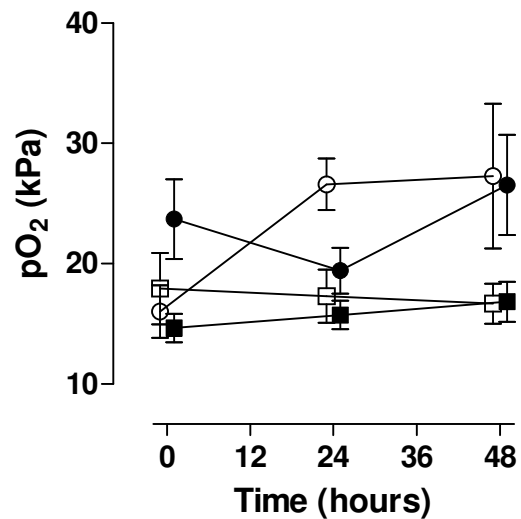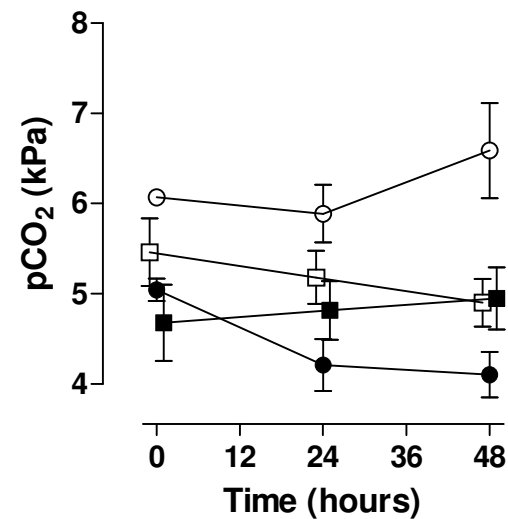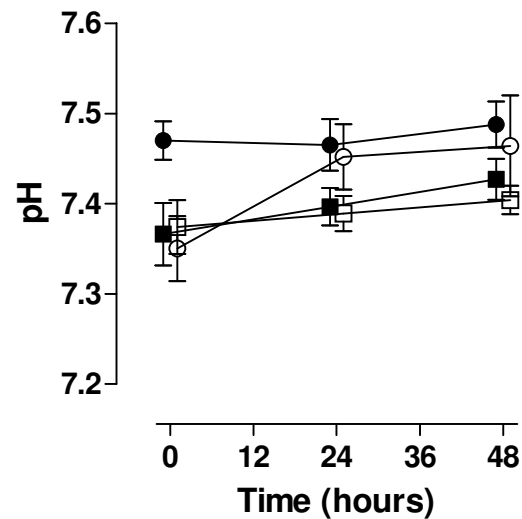

Supplement: MOESM1 [file 9504752]
